# Supplementary material for: Activated carbons and carbon-containing poly(vinyl alcohol) cryogels: characterization, protein adsorption and possibility of myoglobin clearance
Source: Royal Society of Chemistry journal article supplement (doi:10.1039/c2cp42869e), 2012-01-01
Supplement: c2cp42869e.pdf [file c2cp42869e.pdf]

## Supplementary Materials

### Calculation of pore diffusivity of myoglobin in C1a particles.

Figure S1 illustrates the linear dependence of  $\ln(1-F)$  from time, in accordance with Equation (4) (see Section III b). The slope of the linear dependence  $-\pi^2 D_p / R^2$  equals to  $-0,0023 \text{ min}^{-1}$  or  $-3.8 \times 10^{-5} \text{ s}^{-1}$ . Taking  $R$  as  $25 \mu\text{m} = 25 \times 10^{-4} \text{ cm}$ , one gets  $R^2 = 625 \times 10^{-8} \text{ cm}^2$ . Therefore,

$$D_p = 3.8 \times 10^{-5} \text{ s}^{-1} \times R^2 / \pi^2 = 3.8 \times 10^{-5} \text{ s}^{-1} \times 625 \times 10^{-8} \text{ cm}^2 / 9.86 = 2.4 \times 10^{-11} \text{ cm}^2/\text{s}.$$

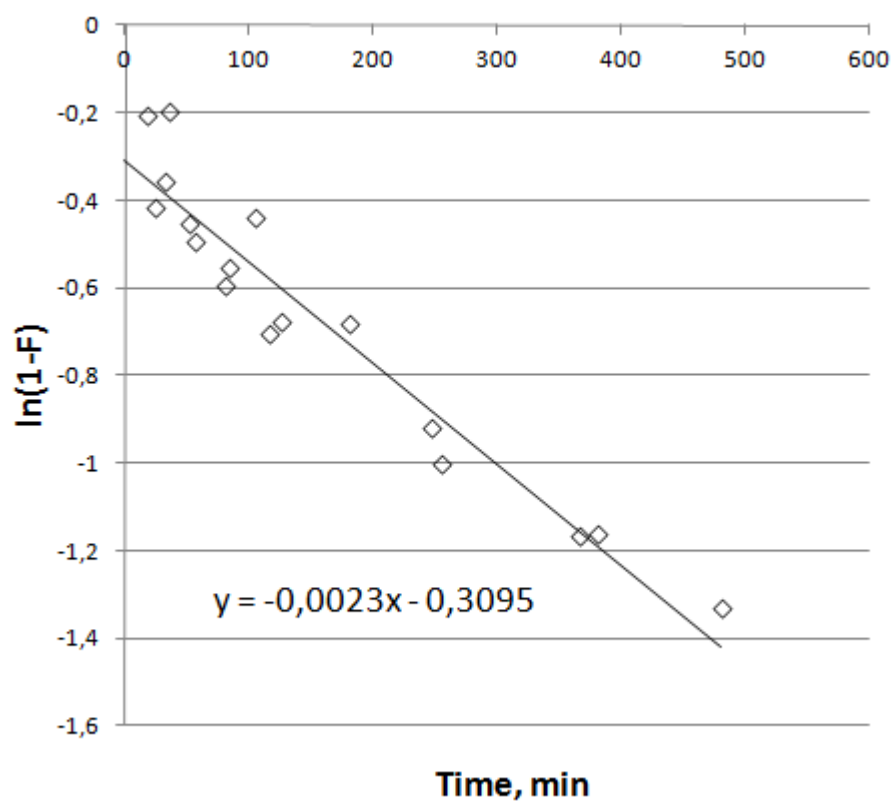

Fig. S1. Dependence of  $\ln(1-F)$  from time.
